# Supplementary material
Source: PubMed Central journal article supplement (PMC5849484)

**Supplemental Table 1. Sequence of primers used for quantitative PCR.**

| Gene          | Species | Sequence                                                                          |
|---------------|---------|-----------------------------------------------------------------------------------|
| $\alpha$ -SMA | mouse   | FWD 5'-GTC CCA GAC ATC AGG GAG TAA-3'<br>REV 5'-TCG GAT ACT TCA GCG TCA GGA-3'    |
| CTGF          | mouse   | FWD 5'-GGG CCT CTT CTG CGA TTT C-3'<br>REV 5'-ATC CAG GCA AGT GCA TTG GTA-3'      |
| CXCL1         | mouse   | FWD 5'-CTG GGA TTC ACC TCA AGA ACA TC-3'<br>REV 5'- CAG GGT CAA GGC AAG CCT C-3'  |
| CXCL2         | mouse   | FWD 5'-CCA ACC ACC AGG CTA CAG G-3'<br>REV 5'- GCG TCA CAC TCA AGC TCT G-3'       |
| F4/80         | mouse   | FWD 5'-TGA CTC ACC TTG TGG TCC TAA-3'<br>REV 5'-CTT CCC AGA ATC CAG TCT TTC C-3'  |
| IL17A         | mouse   | FWD 5'-TTT AAC TCC CTT GGC GCA AAA-3'<br>REV 5'-CTT TCC CTC CGC ATT GAC AC-3'     |
| iNOS          | mouse   | FWD 5'-GTT CTC AGC CCA ACA ATA CAA GA-3'<br>REV 5'-GTG GAC GGG TCG ATG TCA C-3'   |
| Ly6c          | mouse   | FWD 5'-GCA GTG CTA CGA GTG CTA TGG-3'<br>REV 5'-ACT GAC GGG TCT TTA GTT TCC TT-3' |
| MPO           | mouse   | FWD 5'-AGT TGT GCT GAG CTG TAT GGA-3'<br>REV 5'-CGG CTG CTT GAA GTA AAA CAG G-3'  |
| TIMP-1        | mouse   | FWD 5'-CTT GGT TCC CTG GCG TAC TC-3'<br>REV 5'-ACC TGA TCC GTC CAC AAA CAG-3'     |
| TNF           | mouse   | FWD 5'-CCC TCA CAC TCA GAT CAT CTT CT-3'<br>REV 5'-GCT ACG ACG TGG GCT ACA G-3'   |

**Supplemental Table 2: Genotype, liver and body weight**

| <b>Genotype</b>                             | <b>n</b> | <b>Body Weight (g)</b> | <b>Liver Weight (mg)</b> | <b>Liver Weight/Body Weight</b> |
|---------------------------------------------|----------|------------------------|--------------------------|---------------------------------|
| Control                                     | 7        | 4.40 (3.40-5.20)       | 146.0 (114.5-181.8)      | 3.31 (2.81-3.68)                |
| Nlrp3 <sup>A350V</sup>                      | 7        | 1.80 (1.60-2.20)       | 113.0 (93.50-128.8)      | 5.75 (5.34-6.22)                |
| IL17 <sup>-/-</sup>                         | 7        | 5.80 (5.46-6.20)       | 195.0 (153.0-220.0)      | 3.46 (3.00-3.79)                |
| Nlrp3 <sup>A350V</sup> /IL17 <sup>-/-</sup> | 7        | 2.60 (2.41-2.70)       | 145.0 (136.0-151.3)      | 5.54 (4.90-5.99)                |
| TNF <sup>-/-</sup>                          | 7        | 4.10 (3.90-4.30)       | 115.0 (110.0-119.0)      | 2.80 (2.74-4.10)                |
| Nlrp3 <sup>A350V</sup> /TNF <sup>-/-</sup>  | 7        | 3.67 (3.00-4.30)       | 118.0 (105.0-141.0)      | 3.27 (3.25-3.50)                |

Supplemental Figure 1: Strategy for immunohistochemistry analysis.

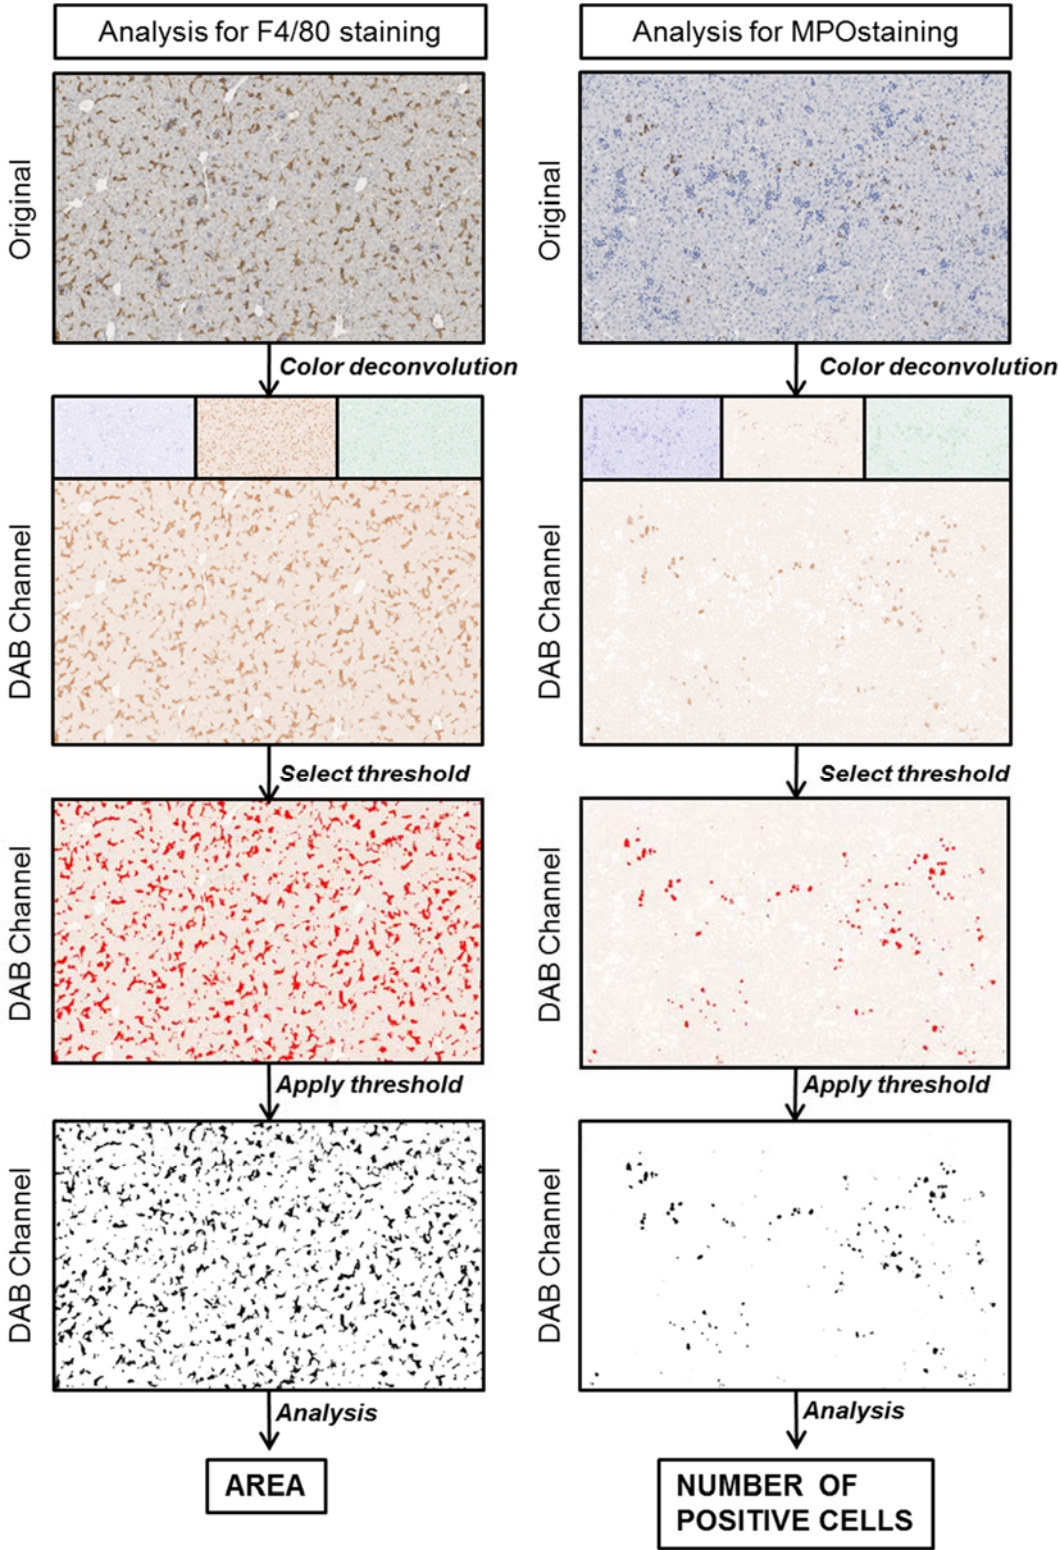

Supplement: NIHMS908803-supplement-Supp_info.pdf [file NIHMS908803-supplement-Supp_info.pdf]
